# Supplementary material
Source: PubMed Central journal article supplement (PMC8051484)
Supplement: 3388_table.pdf [file 3388_table.pdf]

**On-line Table: Patient characteristics**

| Patient No. | Fundoscopy Available | Results of Fundoscopy                            | Diagnosis/MR Imaging Findings                                                          | Time from Fundoscopy to MR Imaging (days) |
|-------------|----------------------|--------------------------------------------------|----------------------------------------------------------------------------------------|-------------------------------------------|
| 1           | Yes                  | Grade III OD                                     | 1) Idiopathic intracranial hypertension                                                | 4                                         |
|             |                      | Grade III OS                                     | 2) Negative brain and orbital MR imaging                                               |                                           |
| 2           | Yes <sup>a</sup>     | Grade III OD                                     | 1) Idiopathic intracranial hypertension                                                | 3                                         |
|             |                      | Grade I-II OS                                    | 2) Negative brain and orbital MR imaging                                               |                                           |
| 3           | Yes <sup>a</sup>     | Grade III OD                                     | 1) Idiopathic intracranial hypertension                                                | 21                                        |
|             |                      | Grade III OS                                     | 2) Mild flattening of both posterior sclera on MR imaging                              |                                           |
| 4           | Yes <sup>a</sup>     | Grade V OD                                       | 1) Idiopathic intracranial hypertension                                                | 2                                         |
|             |                      | Grade V OS                                       | 2) Mild flattening of both posterior sclera on MR imaging                              |                                           |
| 5           | Yes <sup>a</sup>     | Grade I OD                                       | 1) Idiopathic intracranial hypertension                                                | 1                                         |
|             |                      | Grade III OS                                     | 2) Negative brain and orbital MR imaging results                                       |                                           |
| 6           | Yes <sup>a</sup>     | Grade I OD                                       | 1) Idiopathic intracranial hypertension                                                | 2                                         |
|             |                      | Grade I-II OS                                    | 2) Negative brain and orbital MR imaging results                                       |                                           |
| 7           | Yes <sup>a</sup>     | Grade I-II OD                                    | 1) Minocycline-induced intracranial hypertension                                       | 6                                         |
|             |                      | Grade I-II OS, OS > OD                           | 2) Negative brain and orbital MR imaging results                                       |                                           |
| 8           | Yes <sup>a</sup>     | Grade I-II OD                                    | 1) Idiopathic intracranial hypertension                                                | 1                                         |
|             |                      | Grade I OS                                       | 2) Minimal intraocular protrusion of right ON head on MR imaging                       |                                           |
| 9           | Yes <sup>a</sup>     | Grade II-III OD                                  | 1) Idiopathic intracranial hypertension                                                | 1                                         |
|             |                      | Grade II-III OS, OD > OS                         | 2) Negative brain and orbital MR imaging results                                       |                                           |
| 10          | Yes <sup>a</sup>     | Grade II OD                                      | 1) Idiopathic intracranial hypertension                                                | 1                                         |
|             |                      | Grade II OS                                      | 2) Negative brain and orbital MR imaging results                                       |                                           |
| 11          | Yes <sup>a</sup>     | Grade IV-V OD                                    | 1) Idiopathic intracranial hypertension                                                | 4                                         |
|             |                      | Grade IV-V OS                                    | 2) Bilateral ON sheath distention and mild posterior scleral flattening on MR imaging  |                                           |
| 12          | Yes <sup>a</sup>     | Grade III OD                                     | 1) Idiopathic intracranial hypertension                                                | 32 <sup>b</sup>                           |
|             |                      | Grade III OS                                     | 2) Negative brain and orbital MR imaging results                                       |                                           |
|             |                      | Drusen present                                   |                                                                                        |                                           |
| 13          | Yes <sup>a</sup>     | Grade I OD                                       | 1) Idiopathic intracranial hypertension                                                | 2                                         |
|             |                      | Grade III OS                                     | 2) Mild bilateral ON sheath distention on MR imaging                                   |                                           |
| 14          | Yes <sup>a</sup>     | Bilateral papilledema; exact grade not available | 1) Idiopathic intracranial hypertension,                                               | Unknown                                   |
|             |                      |                                                  | 2) Intraocular protrusion of both ON heads with distention of ON sheaths on MR imaging |                                           |
| 15          | Yes <sup>a</sup>     | Grade III-IV OD                                  | 1) Idiopathic intracranial hypertension                                                | 7                                         |
|             |                      | Grade III-IV OS                                  | 2) Minimal bilateral ON head protrusion on MR imaging                                  |                                           |
| 16          | Yes                  | Grade I-II OD                                    | 1) Idiopathic intracranial hypertension                                                | 3 <sup>b</sup>                            |
|             |                      | Grade II OS                                      | 2) Minimal distention of ON sheaths on MR imaging                                      |                                           |
| 17          | No                   | N/A                                              | 1) Idiopathic intracranial hypertension                                                | N/A                                       |
|             |                      |                                                  | 2) Negative brain and orbital MR imaging results                                       |                                           |
| 18          | Yes <sup>a</sup>     | Grade IV OD                                      | 1) Idiopathic intracranial hypertension                                                | 1                                         |
|             |                      | Grade III OS                                     | 2) Prominent ON sheaths on MR imaging                                                  |                                           |
| 19          | No                   | N/A                                              | 1) Lung cancer with brain metastasis and visual changes                                | N/A                                       |
|             |                      |                                                  | 2) Negative orbital MR imaging results                                                 |                                           |

**Note:**—OD indicates right eye; OS, left eye; N/A, not applicable.

<sup>a</sup> Fundoscopy performed by a neuro-ophthalmologist.

<sup>b</sup> Fundoscopy performed after MR imaging.
